# Supplementary material for: SCARB2 Drives Hepatic Carcinoma Initiation by Supporting Cancer Stem Cell Traits and Enhancing MYC Transcriptional Activity
Source: Research Square preprint supplement (doi:10.21203/rs.3.rs-1313420/v1), 2022-02-17
Supplement: Supplementary file 1 [file 91e0337039122ef617d23653.docx]

| Positions within proteins | Protein | Score diff | Acetyl (K) Probabilities | Acetyl (K) Score diffs |
| --- | --- | --- | --- | --- |
| 148 | NP_002458 | 89.2306 | LVSEK(1)LASYQAAR | LVSEK(89.23)LASYQAAR |
| 326 | NP_002458 | 50.4729 | RVK(1)LDSVR | RVK(50.47)LDSVR |

**Supplementary Table 1**
